1                   Genome wide efficiency profiling reveals  
2                   modulation of maintenance and de novo  
3                   methylation by Tets

4   Pascal Giehr <sup>\*1</sup>, Charalampos Kyriakopoulos <sup>\*2</sup>, Karl Nordström<sup>1</sup>,  
5   Abduhrahman Salhab<sup>1</sup>, Fabian Müller<sup>5</sup>, Ferdinand von Meyenn<sup>6</sup>,  
6   Gabiella Ficz<sup>7</sup>, Wolf Reik<sup>8</sup>, Verena Wolf <sup>†2</sup>, and Jörn Walter <sup>†1</sup>

7                   <sup>1</sup>Department of Genetics and Epigenetics, Saarland University,  
8                   Campus A2.4,66123 Saarbrücken, Germany

9                   <sup>2</sup>Computer Science Department, Saarland University, Campus E1.3,  
10                   66123 Saarbrücken, Germany

11                   <sup>5</sup>Genetics Department, Stanford University, 94305 Stanford, USA

12                   <sup>6</sup>Department of Health Sciences and Technologys, ETH Zürich,  
13                   Schorenstrasse 16, 8603 Schwerzenbach, Switzerland

14                   <sup>7</sup>Haemato-Oncology, Queen Mary University of London, EC1M6BQ  
15                   London, United Kingdom

16                   <sup>8</sup>Epigenetics Department, Babraham Institute, CB223AT Cambridge,  
17                   United Kingdom

## 18 **Abstract**

19 **Background** DNA methylation is an essential epigenetic modification which is  
20 set and maintained by DNA methyl transferases (Dnmts) and removed via active  
21 and passive mechanisms involving Tet mediated oxidation. While the molecular  
22 mechanisms of these enzymes are well studied, their interplay on shaping cell specific  
23 methylomes remains less well understood. In our work we model the activities of  
24 Tets and Dnmts at single CpGs across the genome using a novel type of high  
25 resolution sequencing data.

26 **Results** To accurately measure 5mC and 5hmC levels at single CpGs we devel-  
27 oped RRHPoxBS, a reduced representation hairpin oxidative bisulfite sequencing  
28 approach. Using this method we mapped the methylomes and hydroxymethylomes  
29 of wild type and Tet triple knockout mouse embryonic stem cells. These com-  
30 prehensive datasets were then used to develop an extended Hidden Markov model  
31 allowing us i) to determine the symmetrical methylation and hydroxymethylation  
32 state at millions of individual CpGs, ii) infer the maintenance and *de novo* methy-  
33 lation efficiencies of Dnmts and the hydroxylation efficiencies of Tets at individual  
34 CpG positions. We find that Tets exhibit their highest activity around unmethylated  
35 regulatory elements, i.e. active promoters and enhancers. Furthermore, we find that  
36 Tets' presence has a profound effect on the global and local maintenance and *de*  
37 *novo* methylation activities by the Dnmts, not only substantially contributing to  
38 a universal demethylation of the genome but also shaping the overall methylation  
39 landscape.

40 **Conclusions** Our analysis demonstrates that a fine tuned and locally controlled in-  
41 terplay between Tets and Dnmts is important to modulate *de novo* and maintenance

---

\*These authors contributed equally to this work

†Correspondence: wolf@cs.uni-saarland.de (VW), j.walter@mx.uni-saarland.de (JW)

42 activities of Dnmts across the genome. Tet activities contribute to DNA methyla-  
43 tion patterning in the following ways: They oxidize 5mC, they locally shield DNA  
44 from accidental *de novo* methylation and at the same time modulate maintenance  
45 and *de novo* methylation efficiencies of Dnmts across the genome.

## 46 **Background**

47 Genetic information encoded in the DNA is regulated by epigenetic mechanisms,  
48 such as DNA methylation [1, 2, 3, 4]. In mammals, the methylation of DNA is  
49 restricted to cytosine and is almost exclusively found in a palindromic CpG di-  
50 nucleotide context [5, 6, 7]. Generation of 5-methylcytosine (5mC) is catalyzed  
51 by the DNA methyltransferases Dnmt1, Dnmt3a, Dnmt3b and Dnmt3c. These  
52 enzymes catalyze the transfer of a methyl group from S-adenosyl methionine to the  
53 fifth carbon atom of cytosine.

54 Even though under certain conditions Dnmt1 has been shown to methylate also  
55 unmethylated CpGs [16, 17, 18], this enzyme is mainly responsible for maintain-  
56 ing existing methylation patterns after replication. Via interaction with Uhrf1 and  
57 PCNA, Dnmt1 is tightly associated with the replication machinery [8, 9]. Further-  
58 more, the cooperation with Uhrf1 modulates Dnmt1 to be receptive for hemimethy-  
59 lated DNA generated after replication [10, 11]. Thus, the protein complex post-  
60 replicatively copies the methylation pattern from the inherited to the newly synthe-  
61 sized DNA strand [12, 13].

62 Dnmt3a, Dnmt3b and Dnmt3c methylate DNA independently of its methyla-  
63 tion status (hemimethylated or unmethylated) and are mainly responsible for the  
64 establishment of new methylation patterns during development [14, 15].

65 Once established, 5mC can be further processed by a family of di-oxygenases, the  
66 ten-eleven translocation enzymes Tet1, Tet2 and Tet3 [19, 20, 21]. These Fe(II) and  
67 oxo-glutarate-dependent enzymes consecutively oxidize 5mC to 5-hydroxymethyl cy-

68 tosine (5hmC), 5-formyl cytosine (5fC) and ultimately to 5-carboxy cytosine (5caC)  
69 [22, 23]. 5hmC is the most abundant oxidative variant and can be found in numer-  
70 ous cell types [24, 25, 26]. Each oxidation step changes the chemical properties of  
71 the base and with it its biological function [27, 28, 29]. Several mechanisms have  
72 been proposed in which oxidative cytosine derivatives (oxC) serve as an intermedi-  
73 ate during the course of active or passive demethylation [30, 31, 32, 33, 34]. Such  
74 removal of 5mC occurs locally during cell differentiation, but also on a genome-  
75 wide scale in the zygote, as well as during the maturation of primordial germ cells  
76 (PGCs) [35, 36, 37]. Global loss of 5mC has been observed in cultivated mouse  
77 embryonic stem cells (ES cells) during their transition from Serum to 2i medium  
78 (2i). Under classical Serum/LIF conditions, ES cells exhibit DNA hypermethylation,  
79 whereas upon transition to GSK3 $\beta$  and Erk1/2 inhibitors (2i containing medium),  
80 the cells experience a gradual genome-wide loss of 5mC [38, 39, 40]. Even though  
81 the enzymatic mechanisms of oxCs generation are well characterized, the question  
82 how oxCs are inherited across replication, as well as the impact of Tets and oxCs  
83 on maintaining or changing an existing methylome remains elusive.

84 To address these questions we developed and applied **Reduced Representation**  
85 **Hairpin oxidative Bisulfite Sequencing** (RRHPoxBS), which combines three fea-  
86 tures: (i) a genome-wide detection of a representative number of CpGs (RRBS),  
87 (ii) a strand-specific detection of 5mC by using a short hairpin oligo (HPBS) and  
88 lastly, (iii) the localization of 5mC and 5hmC, respectively, by combining regular and  
89 oxidative bisulfite sequencing (oxBS) [41, 42, 43, 44, 45]. We use then these deep  
90 RRHoxBS data as input for an extended version of a Hidden Markov Model (HMM)  
91 first presented in [46, 47], to predict the levels and the strand specific distribution  
92 of 5mC and 5hmC and estimate the enzymatic activities of Dnmts for maintenance  
93 methylation, *de novo* methylation, and hydroxylation of Tets in 2i over time. Finally  
94 we interpret these data in the context of the genome and other epigenetic features.

95 We find a very specific spatial distribution of Tet activity and show that DNA  
96 methylation and hydroxylation efficiencies of Dnmts and Tets are negatively corre-  
97 lated throughout the genome in a very consistent fashion. Finally, we infer that the  
98 absence of Tet enzymes in Tet triple knockout (TKO) cells changes maintenance  
99 and *de novo* efficiency profiles in regions, which are protected by Tet enzymes in  
100 wild type (WT) ES cells.

## 101 **Methods**

### 102 **Reduced Representation Hairpin oxidative Bisulfite Sequencing** 103 **(RRHPoxBS)**

104 1.2 $\mu$ g DNA was divided equally into three 0.5ml reaction tubes and digested in a  
105 20 $\mu$ l reaction using 20U of HaeIII (NEB), AluI (NEB) and 10U HpyCH4V (NEB),  
106 respectively. The reactions were incubated overnight for a minimum of 12h at 37°C.  
107 Restriction enzymes were inactivated at 80°C for 30min. The reactions were pooled  
108 and purified using 2x AmpureXP beads (120 $\mu$ l) from Beckman Coulter. DNA was  
109 eluted in 18 $\mu$ l ddH<sub>2</sub>O and subjected to A-tailing by adding 1 $\mu$ l dATP(1mM) and 1 $\mu$ l  
110 Klenow exo-(5U/ $\mu$ l, NEB), incubated at 37°C followed by an inactivation at 75°C for  
111 30min. Next, hairpin linker and sequencing adapter were ligated to opposed ends of  
112 each restriction fragment. For this, 1 $\mu$ l biotin labeled hairpin linker (100 $\mu$ M), 0.5 $\mu$ l  
113 sequencing adapter(100 $\mu$ M), 2.5 $\mu$ l ATP(10mM), as well as 1 $\mu$ l T4 DNA Ligase  
114 (200U/ $\mu$ l, NEB) were added to the A-tailed DNA and incubated for 16h at 16°C.  
115 The reaction was purified using AMPureXP(2x) beads followed by enrichment for  
116 hairpin containing fragments with streptavidin beads (Dynabeads™M-280 Strepta-  
117 vidin, ThermoFischer). The library was then subjected to BS/oxBS work-flow of the  
118 TrueMethyl kit from CEGX according to manufacturer's instructions. Amplification  
119 of the library was done using HotStarTaq® polymerase (Qiagen) and sequencing

120 was performed on an Illumina HiSeq2500 platform in a 150bp paired-end sequencing  
121 mode. We generated six hairpin libraries (BS and oxBS, respectively) for WT ES  
122 cells at three distinct time points - Serum/Lif(d0), 2i 72h (d3) and 2i 144h (d6), as  
123 well as four libraries for TetTKO cells (BS only) - Serum/LIF, 2i 48h (d2), 2i 96h  
124 (d4) and 168h (d7).

## 125 **Read Mapping and Methylation Calling**

126 The sequences were aligned as suggested by Porter *et al.* [48]. In detail; reads  
127 were trimmed for adapter, hairpin-linker and 3' quality ( $Q \geq 20$ ) with TrimGalore!  
128 [49] and cutadapt [50]. Trimmed read pairs were aligned with the Smith-Waterman  
129 algorithm allowing for bisulfite induced mismatches. The two bisulfite converted  
130 strands were used to deduce the original genomic sequence. Mismatches other than  
131 G-to-A and T-to-C were replaced with N. The resulting sequences were aligned to  
132 the mouse genome (mm10) with GEM-mapper (beta build 1.376) [51], after which  
133 the methylation information was reintroduced with a custom pileup function based  
134 on HTSJDK [52] and ratios for the four methylation states were calculated for each  
135 cytosine. The pipeline was implemented with the Ruffus pipeline framework [53].

## 136 **Statistical Modeling**

### 137 **Estimation of (hydroxy-)methylation levels**

138 For CpGs with observations at up to two time points we combined information from  
139 BS and oxBS experiments to arrive at maximum likelihood estimates (MLEs) for  
140 strand specific (hydroxy-)methylation levels for each observation time point. The  
141 derived MLEs take into account the conversion errors of each experiment and we  
142 estimate their accuracy by approximating the corresponding standard deviations.  
143 For details see [SI Sec. 1](#) and [Sec. 2](#).

#### 144 **Estimation of Enzymatic Efficiencies**

145 For CpGs for which the maximal number of three observation time points is available,  
146 we defined an underlying discrete time Markov process that shapes the demethy-  
147 lation dynamics. The state space of the process is the set of possible CpG's site  
148 state  $s \in \mathcal{S} = \{u, m, h\}^2$ , where state  $s$  encodes whether the upper and the lower  
149 strand of the site is *unmethylated* ( $u$ ), *methylated* ( $m$ ) or *hydroxylated* ( $h$ ). E.g.  
150 in state  $(h, u)$  the upper strand is hydroxylated and the lower strand is unmethy-  
151 lated. The model's time parameter corresponds to the number of cell divisions and  
152 the transitions of a state are being triggered by consecutive division or (hydroxy-)  
153 methylation events. Getting measurements along with the conversion errors from  
154 two different experiments (BS and oxBS) allows us to define one HMM for each  
155 experiment and get accurate estimates for the model's parameters. The latter are  
156 linear functions that represent the enzymes' efficiencies over time. In addition, a  
157 parameter related to the recognition of 5hmC by Dnmts (passive demethylation) is  
158 being estimated for each CpG. For a detailed presentation of the above model we  
159 refer the reader to Giehr *et al.* 2016 [47, 46] and to [SI Sec. 1 and 2](#).

160 In case of an adequate number of samples per time point when a very deep se-  
161 quencing is possible, the MLE provides accurate estimates with narrow confidence  
162 intervals [47]. On the other hand, MLE is known to give imprecise results for a  
163 smaller number of samples [54, 55] and in particular in cases where the true values  
164 are close to the boundary constraints [56]. Since a consistently deep sequencing  
165 ( $\geq 100\times$ ) is under the current methods impossible on a genome-wide level, we de-  
166 velop here a combination of MLE and Bayesian Inference (BI) methods in order to  
167 get accurate estimates even in case of a lower coverage, common for genome wide  
168 applications. In particular, we use a MLE step as initial information to be given to  
169 a Metropolis-Hastings MCMC sampler from which we get the posterior distribution  
170 of the parameters. The approach is being described in detail in [SI Sec. 3](#).

## 171 **Clustering of Single CpG Efficiencies**

172 To identify CpGs with similar enzymatic profiles we cluster the genome-wide output  
173 of our model, meaning the efficiencies of the enzymes responsible for maintenance  
174 methylation, *de novo* methylation and hydroxylation over time for  $1.5 \cdot 10^6$  CpGs  
175 uniformly located across the entire genome. Since we aim to cluster parameter  
176 estimates we consider *k*-error, a sophisticated clustering approach that takes into  
177 account the uncertainty, i.e., posterior's covariance matrix, around the BI estimators,  
178 i.e., posterior's mean. The clustering approach we apply here returns different  
179 and probably more "natural" clusters than a typical *k*-means clustering algorithm  
180 would return. We determine the optimal number of clusters based on two different  
181 criteria, Davies-Bouldin Criterion and the elbow method. For details of the individual  
182 clustering approaches we refer to [SI Sec. 3.1](#).

## 183 **Segmentation**

184 The whole genome bisulfite data of primed mouse ES cells (Ficz *et al.* 2013) was  
185 segmented into low methylation regions (LMRs), unmethylated regions (UMRs) and  
186 partially methylated domains (PMDs) [38], using MethylSeekR [57]. The rest of  
187 the genome, after filtering gaps annotated by UCSC, was called highly methylated  
188 regions (HMRs) [58]. The aggregated strand information per CpG was used as  
189 an input for MethylSeekR. The applied parameters were the following; coverage of  
190  $\geq 5x$ ,  $\leq 50\%$  methylation and FDR  $< 0.05$  for calling hypomethylation regions and  
191 consequently a cutoff of  $\geq 4$  CpGs per LMR.

## 192 **LOLA Analysis**

193 We performed a standard LOLA analysis against the regular LOLA universe, ex-  
194 tended by ChIP-Seq profiles from von Meyenn *et al.* 2016 (GSE70724, GSE77420),  
195 Walter *et al.* 2016 (GSE71593) and Encode. [40, 59, 60].



## 196 **Chip-Seq Data Processing**

197 Low quality read tails (Q<sub>i</sub>20) and adapter sequences were trimmed using TrimGalore!  
198 (version 0.4.2) ([http://www.bioinformatics.babraham.ac.uk/projects/trim\\_](http://www.bioinformatics.babraham.ac.uk/projects/trim_galore)  
199 [galore](http://www.bioinformatics.babraham.ac.uk/projects/trim_galore)). Trimmed reads were aligned to the mouse reference genome (mm10) using  
200 GEM mapper (version 1.376 beta) (Marco-Sola *et al.*, 2012). Samtools (version 1.3)  
201 (Li *et al.*, 2009) was used to convert SAM to BAM format. MarkDuplicate (ver-  
202 sion 1.115) from Picard tools (<http://broadinstitute.github.io/picard/>)  
203 was used to mark the PCR duplications. Normalized coverage files with respect  
204 to library size were generated using deepTools v1.5.9.1 (Ramírez *et al.*, 2014) with  
205 bamCoverage command.

## 206 **Hi-C Data Processing**

207 Homer tool was used to process Hi-C data (PMID: 20513432, PMID:30146161).  
208 Reads were trimmed considering DpnII (GATC) as a restriction enzyme in the Hi-  
209 C assay. Mates were aligned separately to mouse genome (mm10) using bowtie2  
210 (<https://doi.org/10.1038/nmeth.1923>). PCR duplicates were removed. A tag  
211 directory was generated with makeTagDirectory command which was used after-  
212 wards by runHiCpca.pl command to identify A/B compartments at 25kb resolution  
213 and 50kb window (super resolution). Positive values were assigned to A compart-  
214 ments while the negative ones were assigned to B compartments.

## 215 **Results**

216 In our study we used a well established ES cell system to precisely map 5mC and  
217 5hmC across the genome in a time series of experiments and to study the en-  
218 zymatic contribution of Tets and Dnmts for the progressive genome wide DNA  
219 (de)methylation. For this we first needed to generate a high resolution data set

220 based on a novel genome wide hairpin sequencing approach, **Reduced Representation**  
221 **Hairpin oxidative Bisulfite Sequencing (RRHPoxBS)**. The design of the RRHPoxBS  
222 approach covered up to 4 million CpG dyads for which we could infer the precise  
223 distributions of 5mC and 5hmC. Following a strict read and conversion quality con-  
224 trol, we filtered for sufficient sequencing depth and ended up with about 2 million  
225 CpGs per sample for subsequent comparative modeling. To follow the dynamics of  
226 the enzymes over time we generated six data sets for WT ES cells, i.e. BS and  
227 oxBS libraries for three different time points, starting with Serum/Lif (d0), followed  
228 by 72h 2i (d3) and 144h 2i (d6). For a comparison we also generated four datasets  
229 for Tet TKO cells starting with Serum/Lif (d0) followed by 48h in 2i (d2), 96h in  
230 2i (d4) and 168h in 2i (d7).

### 231 **Impaired loss of 5mC in Tet TKO ES cells**

232 Under primed conditions (Serum/LIF) WT ES cells show a overall level of 78%  
233 methylation. About 56% of CpGs are fully methylated while  $\approx 22\%$  are found  
234 in a hemimethylated state (Fig.: 1a). Among cultivation in 2i medium the DNA  
235 becomes progressively demethylated, such that after 6 days in 2i only 30% of CpGs  
236 retain a methylated state (fully or hemimethylated). For all time points, we find  
237 that hemimethylation is equally distributed among both DNA strands (Fig.: 1a and  
238 [SI Sec. 4.3 Figure 23](#)).

239 In addition, we observe that oxBS samples always display lower methylation levels  
240 than BS samples (Fig.: 1a). This difference corresponds to the amount of 5hmC of  
241 each sample. We detect the main difference in the hemimethylated proportion, indi-  
242 cating that a considerable amount of 5hmC might exist in a hemi(hydroxy)methylated  
243 (5hmC/C or C/5hmC) state (Fig.: 1a). Initially, the amount of 5hmC is quite low  
244 but we observe a notable increase at d3, while later (d6) the amount of 5hmC  
245 decreases again (Fig.: 1a).

246 ES cells lacking Tet enzymes (Tet TKO) show a marginal increase of methylated  
247 CpG dyads (82% fully- or hemimethylated, Fig.: 1c) in comparison to WT under  
248 primed conditions (Serum/LIF). However, in relation to WT the TKO cells show a  
249 higher frequency of fully methylated CpGs ( $\approx 72\%$ ) and a reduced proportion of  
250 hemimethylated CpGs (hemiCpGs;  $\approx 10\%$ ) (Fig.: 1c). We concluded that in WT  
251 ES cells, the enhanced presence of hemiCpGs is directly coupled to 5mC oxidation  
252 by Tets.

253 On a first glimpse Tet TKO ES cells might show similar kinetics of DNA  
254 demethylation as WT ES cells (Fig.: 1c). However, in contrast to previous data  
255 [60] the RRHoxBS data allow us to precisely estimate the demethylation kinetics re-  
256 vealing that in WT ES cells the generation of unmethylated cytosine is 8% per day,  
257 while in Tet TKO cells it drops to 4.2% (SI Sec. 4.4 Figure 24). This indicates that  
258 the presence of Tets has a considerable influence on DNA demethylation kinetics.

259 RRHPoxBS sequencing also allowed us to accurately determine the amount,  
260 location and distribution of non-CpG methylation in (WT and Tet TKO) ES cells.  
261 In both, WT and TKO, we find CpA to be the most frequent methylated non-CpG  
262 motif (SI Sec. 4.7 Figure 32 and 33). Over time, non-CpG methylation becomes  
263 gradually reduced upon cultivation in 2i. In WT ES cells the number of methylated  
264 non-CpGs was identical in BS and oxBS libraries, indicating that non-CpGs are not a  
265 substrate for Tet oxidation (Fig.: 1b). In Tet TKO cells, the number of methylated  
266 non-CpGs is approximately doubled as compared to WT ES cells. Since non-CpG  
267 methylation is strictly dependent on the presence of *de novo* methylation activities  
268 by Dnmt3a/b, the higher non-CpG methylation in TKO cells, both under primed  
269 ( $\geq 2\%$ ) and naive ( $\geq 0.6\%$  after 168h 2i) conditions (Fig.: 1d), points clearly  
270 towards an increased *de novo* methylation activity by Dnmt3a/b in the absence of  
271 Tet enzymes.

## 272 Tet TKO ES cells retain de novo methylation activity

273 The genome wide observations in WT and TKO cells prompted us to deeper exam-  
274 ine the relative contributions of Dnmts and Tets at individual CpGs. The developed  
275 HMM approach considers conversion errors of BS and oxBS treatment and esti-  
276 mates accurate 5mC and 5hmC levels, as well as the strand specific distribution  
277 of both cytosine forms. Furthermore, combining the strengths of MLE and BI our  
278 model estimates at every individual CpG the enzyme efficiencies of *i*) maintenance  
279 methylation, *ii*) *de novo* methylation and *iii*) hydroxylation enzymes that explain  
280 the observed dynamics of the (hydroxy-)methylation patterns over time.

281 The estimated methylation levels for WT and Tet TKO ES cells fit nicely to  
282 the hairpin methylation data (SI Sec. 3, Fig.: 3), indicating a high accuracy of our  
283 model. Consequently, we observe a constant decline of fully methylated CpGs in  
284 WT ES cells over time (Fig.: 2a). Moreover, in WT ES cells, the HMM estimates  
285 a notable amount of 5hmC at all time points. Note that the displayed amount of  
286 5hmC (yellow) refers to the sum of all possible 5hmC states, i.e., 5hmC/5hmC,  
287 5hmC/5mC, 5mC/5hmC, 5hmC/C, C/5hmC. The highest amount of 5hmC is ob-  
288 served at d3, meaning that WT ES cells display a transient increase of 5hmC after  
289 cultivation in 2i. We observe a similar behaviour for hemiCpGs in WT ES cells. The  
290 parameter estimation by our model illustrates a mean maintenance methylation ef-  
291 ficiency of about 61.4% at d0, which remains almost constant over time (60.1% at  
292 d6) (Fig.: 2b). In contrast, *de novo* methylation efficiency shows a strong decrease  
293 (from 14.1% to 4.5% at d6) and the hydroxylation efficiency an increase (from  
294 22.2% at d0 to 29.1% at d6) over time. This observation is in agreement with  
295 previous observations which demonstrated a reduction in RNA and protein levels  
296 of Dnmt3a/b in 2i, but an increased expression of Tet1/2 on a genome wide level  
297 [38, 60].

298 In Tet TKO cells maintenance efficiency lies by 58.8% at d0, which represents

299 a marginal reduction compared to WT ES cells. Similarly to WT, maintenance  
300 efficiency remains stable over time (58.6% at d7) also in Tet TKO cells.

301 The most pronounced difference between WT and Tet TKO cells we see in *de*  
302 *novo* methylation efficiency. More specifically in Tet TKO *de novo* begins from  
303 (20.3%) at day 0 and exhibits only a slight decrease over time (16.2% at d7).

304 Finally, the model output also confirms the observed by the hairpin methylation  
305 data reduced demethylation rate of Tet TKO cells and suggests a substantial contri-  
306 bution of 5hmC and Tet enzyme on DNA demethylation. In fact, the model favors a  
307 scenario in which 5hmC is less well recognized (probability of non recognition equals  
308  $p = 0.66$ , [SI Sec. 1.1](#)) by the maintenance machinery after replication, promoting a  
309 faster demethylation process.

## 310 **Tets prevent the spreading of DNA methylation**

311 We next related the model estimates to genomic, enzymatic and epigenetic features  
312 first focusing on Dnmt and Tet enzyme efficiencies across large genome segments  
313 with distinct methylation states.

314 We used MethylSeekR [57], to partition the genome into four states: highly  
315 methylated regions (HMRs), partially methylated domains (PMDs), low methy-  
316 lated regions (LMRs) and unmethylated regions (UMRs). The segmentation was  
317 performed on whole genome bisulfite sequencing (WGBS) data from WT ES cells  
318 cultivated under Serum/Lif conditions (Ficz *et al.* 2013) on the identical cell batch  
319 used for our study [38]. The estimated methylation levels (sum of 5mC and 5hmC)  
320 for WT ES cells by our model fully agreed with those derived from WGBS ([SI](#)  
321 [Sec. 4.8, Fig.: 35.C and 35.E](#)). This not only confirmed the accuracy of our model  
322 output but also denoted that we can use the precise WGBS segmentation for further  
323 analysis. We found that the majority of the WT ES cell genome (86%) consists of  
324 large HMRs ([SI Sec. 4.8, Fig.: 35.A and Fig.: 35.B](#)) followed by shorter ( $\approx 13\%$ )

325 PMDs. The residual 2% of the genome are found to be LMRs (0.4%) or UMRs  
326 (1.5%)(SI Sec. 4.8, Fig.: 35.A and Fig.: 35.B).

327 Next we assigned the 5mC and 5hmC modification levels, their distribution at  
328 CpG dyads and the corresponding Dnmt/Tet enzyme efficiencies determined by our  
329 model to CpGs in the individual segments (Fig.: 3a and 3b). In WT ES cells, all  
330 segments show a continuous reduction in DNA methylation over time. This is par-  
331 ticularly evident in segments with initial high 5mC levels, i.e., HMRs and PMDs.  
332 HMRs and PMDs also exhibit the highest amount of 5hmC and hemiCpGs which  
333 transiently increases at d3 and d4 (Fig.: 3a). LMRs and UMRs show different ki-  
334 netics as both the amounts of 5hmC and hemiCpGs constantly decline over time.  
335 The increase of hemiCpGs in HMRs and PMDs is a clear sign of impaired mainte-  
336 nance methylation in naive ES cells linked to the reported temporal increase in Tet  
337 expression and loss of Dnmt1 activity [38, 60].

338 Based on the methylation data, our model predicts high maintenance methy-  
339 lation efficiency in HMRs ( $\approx 69\%$ ) and PMDs ( $\approx 61\%$ ), but low maintenance  
340 efficiency in LMRs ( $\approx 32\%$ ) and UMRs ( $\approx 26\%$ ). Additionally, we observe a rel-  
341 atively high *de novo* methylation efficiency at HMRs ( $\approx 18\%$ ) in primed ES cells.  
342 Overall, *de novo* methylation efficiency strongly decreases upon cultivation in 2i,  
343 which corresponds well with the previous described loss of Dnmt3a/b under these  
344 conditions. In contrast, hydroxylation efficiency is high in UMRs ( $\approx 63\%$ ) and  
345 LMRs ( $\approx 55\%$ ), but low in HMRs ( $\approx 13\%$ ) and PMDs ( $\approx 24\%$ ). Together, our  
346 results indicate regional differences and an antagonistic behaviour of Dnmts and  
347 Tets. This antagonism has been validated by estimating a robust spatial correlation  
348 measure between the efficiencies of Dnmts and Tets across the whole genome (SI  
349 Sec. 3.3, Fig.: 12).

350 Both WT and TKO ES cells show overall a decline of DNA methylation across  
351 all segments over time (Fig.:3a). However, in TKO cells, all segments retain a

352 substantial higher frequency of fully methylated CpG dyads across all time points.  
353 This observation indicates a reduced demethylation rate in all segments under the  
354 absence of Tets. Surprisingly, under primed conditions (d0) Tet TKO cells show a  
355 higher number of unmethylated CpGs in HMRs as compared to WT ES cells.

356 Most importantly, comparing the Tet TKO with WT ES cells, we observe a  
357 strong change in Dnmt efficiencies. Maintenance methylation efficiency shows a  
358 reduction in HMRs and PMDs of TKO cells, while it clearly increases in LMRs and  
359 UMRs (Fig.: 3b), resulting in almost equal maintenance activity across all segments.  
360 In the case of *de novo* methylation efficiency, we observe a more stable and slightly  
361 increased activity in all segments.

### 362 **Tet efficiency marks active and poised regulatory regions**

363 To deeper dwell into the spatial distribution of the various enzymatic profiles across  
364 the genome we performed a clustering of all CpGs based on their individual enzymatic  
365 efficiencies (along with their temporal changes) in WT ES cells. Following  
366 our approach (SI Sec. 3.1, 3.2) we identified three clusters with distinct profiles of  
367 enzymatic activity (Fig.: 4).

368 Cluster 1 comprises 255492 CpGs (SI Sec. 4.2, Fig.: 37.A) which are characterized  
369 by low methylation levels (5mC of 14%, 5hmC of 11% at d0) (Fig.: 4b).  
370 Accordingly, these CpGs are located mainly in UMRs and, to a lesser extent, in  
371 LMRs (SI Sec. 4.8, Fig.: 37.B). CpGs of Cluster 1 exhibit relatively low maintenance  
372 methylation (40% at d0) and almost no *de novo* activity. Over time, maintenance  
373 methylation slightly increases to 45% at d6. In addition, these CpGs display a very  
374 high hydroxylation efficiency which remains stable over time (66% at d0 to 64% at  
375 d6) (Fig.: 4a).

376 Cluster 2 contains 202562 CpGs (SI Sec. 4.8, Fig.: 37.A) and initially displays a  
377 high methylation level (60% fully methylated CpGs). In addition, CpGs of Cluster

378 2 also show a considerable amount of 5hmC (21%). While the level of 5mC rapidly  
379 declines upon transition to 2i, 5hmC displays a mild transient increase at d3 (24%)  
380 (Fig.: 4b). CpGs of Cluster 2 are dispersed across HMRs and PMDs (SI Sec. 4.8,  
381 Fig.: 37.B). At d0 CpGs assigned to Cluster 2 display a high *de novo* methylation  
382 efficiency (20%) but relatively low maintenance methylation (27%), as well as an  
383 average hydroxylation efficiency (20%). Upon cultivation in 2i, *de novo* methylation  
384 efficiency continuously declines to almost zero percent at d6. In contrast, both  
385 maintenance methylation and hydroxylation efficiency display a notable increase  
386 over time (Fig.: 4a).

387 Cluster 3 comprises 1073476 CpGs (SI Sec. 4.8, Fig.: 37.A) and among the  
388 three clusters, displays the highest amount of 5mC and 5hmC (64% fully methylated  
389 CpGs, 20% 5hmC at d0) (Fig.: 4b). Similar to Cluster 2, we observe a constant  
390 decrease of 5mC, while 5hmC shows a transient increase at d3 (> 26%). CpGs of  
391 Cluster 3 exhibit both high maintenance (69%), as well as high *de novo* methylation  
392 efficiency (25%) at d0. Overtime, we observe a mild reduction in maintenance  
393 (60% at d6) and strong reduction of *de novo* methylation efficiency (4% at d6).  
394 In addition, Cluster 3 exhibits a low hydroxylation efficiency (14% at d0), which  
395 slightly increases over time (20% at d6) (Fig.: 4a). CpGs of Cluster 3 are mainly  
396 located in HMRs and PMDs but also appear frequently in UMRs (SI Sec. 4.8, Fig.:  
397 37.B).

398 An enrichment analysis for CpGs of all three clusters using the LOLA package  
399 [59] provided a deeper insight into their association with genomic and epigenetic  
400 features (Fig.: 4c). CpGs of Cluster 1 were found to be enriched in regions with  
401 clear regulatory signatures. This included a broad enrichment for euchromatic his-  
402 tone marks (H3K4me3, H3K9ac, H3K27ac), binding sites for epigenetic modifiers  
403 (Ez2H, Kdm2a, Kdm2b, Yy1) and Tet1, general and specific transcriptional regula-  
404 tors (Myc, Sin3A, Tbp, Taf1, Taf3, Polr2a), as well as stem cell markers (Pou5f1,



405 Sox2, Myc and Nanog) (Fig.: 4c). In addition, we find a strong overlap of CpGs  
406 from Cluster 1 with UMRs, CpG islands and low complexity repeats. Thus, the  
407 enrichment profile of Cluster 1 indicates that Tet enzymes are more active at open  
408 and accessible chromatin.

409 CpGs of Cluster 2 and 3 are mainly located within repetitive elements (SINEs,  
410 LINEs, LTRs etc.), HMRS and PMDs, as well as domains with broad heterochro-  
411 matic marks such as H3K9me2/3 (Fig.: 4c). However, while Cluster 3 displays  
412 exclusively heterochromatic signatures, CpGs of Cluster 2 are also partially located  
413 at transcription factor binding sites (TFBS), as well as domains containing bivalent  
414 and euchromatic histone marks such as H3K4me3 and H3K4me1, respectively (Fig.:  
415 4c).

416 In Tet TKO ES cells, we observe considerable changes in the enzymatic efficien-  
417 cies across all three clusters which are accompanied by changes in their methylation  
418 patterns. CpGs in Cluster 1 exhibit a notable increase in maintenance- (50% at d0)  
419 and to a smaller extent *de novo* methylation efficiency (5% at d0) which results in a  
420 higher frequency of fully methylated CpGs (27% at d0) and hemimethylated CpGs  
421 at later time points (12% at d4 and d6) (Fig.: 4a). Cluster 2 also shows a clear  
422 increase in maintenance methylation efficiency (d0: 59%), but at the same time a  
423 mild reduction in *de novo* methylation efficiency (d0: 18%). Moreover, we observe  
424 an increase in fully- and hemimethylated CpGs for all time points (from 75% at d0  
425 to 35% day7). However, at d0, Tet TKO cells display a higher frequency of un-  
426 methylated CpGs (15%) in Cluster 2 compared to WT ES cells (Fig.: 4b). Cluster 3  
427 exhibits a reduction in both maintenance- (60%) and *de novo* methylation efficiency  
428 (22%) in Tet TKO cells. Similar to Cluster 2 we observe a higher frequency of fully-  
429 and hemimethylated CpGs across all time points, but at the same time a higher  
430 frequency of unmethylated CpGs at d0 (12%). Overall, comparing the enzymatic  
431 activity between WT and Tet TKO cells we end up with similar observations as in

432 segments comparison. Under the absence of Tets Dnmt1 spreads uniformly across  
433 all clusters, while Dnmt3a/b activity remains stable over time.

#### 434 **Tets regulate Dnmts at TSS and TFBS**

435 The genome wide antagonistic effects of Dnmts' and Tets' activity across segments  
436 and clusters prompted us to plot the enzymatic efficiencies of CpGs across genes,  
437 histone marks and ChIP profiled TFBS using DeepTools [62] (Fig.: 5) in order to  
438 investigate regularities and general local dependencies. In WT cells the enzymes'  
439 efficiencies across genes and TFBS show once more an opposing behavior: At tran-  
440 scription start sites (TSS) and TFBS, high hydroxylation efficiency is coupled to  
441 reduced methylation (both maintenance and *de novo*) efficiency. This inverse be-  
442 havior at TSS remains upon 2i cultivation. *De novo* methylation almost disappears  
443 across the entire gene including the gene body. Under primed conditions *de novo*  
444 methylation is absent in TSS but has a strong presence in the gene body and it  
445 almost disappears from the entire gene over time after the transition to 2i. The  
446 observed efficiency profiles for maintenance methylation, *de novo* methylation and  
447 hydroxylation, correspond nicely to Uhrf1, Dnmt3a/b, as well as Tet1 ChIP profiles,  
448 respectively (SI Sec. 4.6 Fig. 30 and 31).

449 In Tet TKO ES cells the TSS associated drop in maintenance methylation is  
450 much less pronounced and almost absent at d6/d7. In addition, *de novo* methylation  
451 is only mildly reduced upon cultivation in 2i and clearly maintained across the  
452 gene body (Fig.: 5a). Regulatory regions marked by Sox2, H3K4me3 and Tet1  
453 enrichment show a strong hydroxylation activity in WT cells which is inversely  
454 linked to an impaired maintenance and *de novo* methylation activity. Interestingly,  
455 the lack of Tet activity in TKO cells does not change *de novo* methylation but  
456 maintenance activity across regulatory regions (Fig.: 5b).

## 457 Discussion

458 In our study, we provide a comprehensive genome wide DNA-methylation modeling  
459 approach that allowed us to infer how the activity of Dnmts and Tets contribute  
460 to modify CpGs and non-CpGs across the genome in a functional context. This  
461 approach was only possible by applying a novel sequencing method generating high  
462 resolution methylome data at a single CpG resolution and in double stranded DNA.  
463 Our RRHPoxBS data are well in line with previous described overall methylation  
464 levels of mouse ES cells determined by classical RRBS or WGBS [38, 60]. In addi-  
465 tion, RRHPoxBS data comprise three important new features: (i) a genome-wide  
466 representation of up to 4 million CpGs uniformly distributed across the genome, (ii)  
467 a precise determination of 5mC and 5hmC levels at a single CpG dyad and (iii) a  
468 precise mapping of hemimethylated states and positions of non-CpG methylation.

469 The overall evaluation of our RRHPoxBS data showed that hemiCpGs are al-  
470 most equally distributed on both DNA strands following the behavior of symmetric  
471 CpG methylation. This suggests that hemimethylation is most likely the result  
472 of (strand-) undirected *de novo* methylation or active and passive demethylation  
473 events, respectively. Furthermore, we detect more hemimethylation in WT com-  
474 pared to Tet TKO cells, which indicates that Tet enzymes enhance the passive loss  
475 of 5mC. Indeed, our model predicts that 5hmC is probably less well recognized by  
476 Dnmt1 after replication, such that hydroxylation enhances passive demethylation.  
477 In contrast to equally distributed hemimethylation we observe a slight increase in  
478 the minus strand presence of non-CpG methylation. We cannot find a simple bio-  
479 logical (sequence context) or technical (calling/mapping) explanation for this bias.  
480 Non-CpG methylation is always occurring in close vicinity to CpG methylation but  
481 in contrast to CpGs we find that non-CpGs are not a substrate for Tet enzymes,  
482 i.e., we do not find any indication of 5hmC in the non-CpG context. The amount of  
483 non-CpG methylation however is strongly enhanced in the absence of Tet enzymes,

484 which is in line with our observation that *de novo* methylation by Dnmt3a/b is  
485 responsible for the non-CpG methylation is enhanced in Tet TKO cells.

486 Our model provides strong evidence that Dnmts and Tets do not act indepen-  
487 dently at a given CpG, but clearly in an opposed manner. Generally, we observe  
488 a high maintenance and *de novo* efficiency at the majority of the genome, i.e.,  
489 HMRs and PMDs (or inter-/intra-genic regions), while the activity of Tet enzymes  
490 is highest at UMRs and LMRs, such as promoters, TFBS (Sox2, Pou5f1) and TSS.  
491 Recent studies based on chromatin immunoprecipitation support our findings, re-  
492 vealing binding of Dnmt3a/b at the gene body and HMRs, whereas Tet1 binding  
493 was observed across methylation valleys (LMRs and UMRs) [63, 64].

494 The impairment of maintenance methylation has been identified so far as the  
495 main driver of 2i induced DNA demethylation [60] and a role for Tet or oxidative  
496 cytosine forms, on the other hand, has only been recognized for selected loci [38, 60].  
497 The comparison of WT and Tet TKO ES cells in the present study, however, disclose  
498 a notable reduction within the demethylation rate of Tet TKO, compared to WT ES  
499 cells. On average, we detect a reduction in the demethylation rate of almost 50%  
500 from around 8% to 4% loss per day. In our view this is enough to demonstrate that  
501 Tets and their oxidized cytosine products are essential for an effective demethylation  
502 during the Serum-to-2i shift and probably other biological demethylation processes  
503 with similar enzymatic compositions.

504 The loss of Tet enzymes is naturally expected to result in an impaired removal  
505 of 5mC and it does at least for CpGs located in LMRs and UMRs, where we observe  
506 a notable increase in their methylation level. Nevertheless, under primed conditions  
507 and within HMRs we paradoxically observe more unmethylated CpGs (hypomethy-  
508 lation) in Tet TKO ES cells compared to WT ES cells. Recently, López-Moyado *et*  
509 *al.* conducted a systematic investigation of genome wide methylation profiles from  
510 various cell types carrying distinct Tet KO genotypes [61]. Similar to our obser-

511 vations they detected a pronounced loss of DNA methylation in heterochromatic  
512 compartments (i.e., HMRs and PMDs) of Tet TKO mouse ES cells.

513 López-Moyado *et al.* propose a mutual exclusive localization of Dnmts and  
514 Tets in WT ES cells, while in Tet KO cells Dnmts invade domains which were  
515 previously occupied by Tets. Indeed, in the absence of Tets, our model predicts a  
516 clear misregulation in both maintenance and *de novo* methylation efficiency. In Tet  
517 TKO ES cells, we see an increase in maintenance methylation efficiency, but at the  
518 same time a reduction in HMRs and PMDs. Moreover, we observe an increase in  
519 *de novo* methylation efficiency at PMDs. Together, this indicates a displacement  
520 of Dnmt1, as well as Dnmt3a/b, which fits to the hypothesized model by López-  
521 Moyado *et al.*. In addition, Tet TKO cells exhibit a more stable, almost persistent  
522 *de novo* methylation efficiency under naive conditions. The increased non-CpG  
523 methylation of Tet TKO cells detected by RRHPoxBS further supports this finding.  
524 This shows that in the absence of Tets, ES cells also fail to effectively down-regulate  
525 *de novo* methylation efficiency in 2i.

526 Taken together, we hypothesize that Tet enzymes work against methylation in  
527 three ways. (i) They guarantee an efficient conversion of 5mC at accessible regions  
528 and act against its establishment during a cell replication either via passive or active  
529 demethylation, (ii) They inhibit the effectiveness of the maintenance machinery over  
530 regions that should remain unmethylated. (iii) Finally, they ensure an efficient down-  
531 regulation of the *de novo* enzymes, which can not be observed in their absence.

## 532 Conclusion

533 We describe a novel combination of experimental and computational approaches  
534 to investigate the contributions of Tets and Dnmts to the establishment of distinc-  
535 tive DNA methylation patterns across the genome. Our analysis shows that Dnmts  
536 and Tets exhibit clear antagonistic efficiencies at individual CpGs. The comparison

537 of WT and Tet TKO ES cells demonstrates that Tet enzymes contribute notably  
538 to the loss of DNA methylation in the present model system. Moreover, Tet en-  
539 zymes seem to protect unmethylated regions against both *de novo* and maintenance  
540 methylation efficiency and to restrict the activity of Dnmts in highly methylated re-  
541 gions, guaranteeing the formation and maintenance of cell type specific methylation  
542 patterns.

543 **Figures**

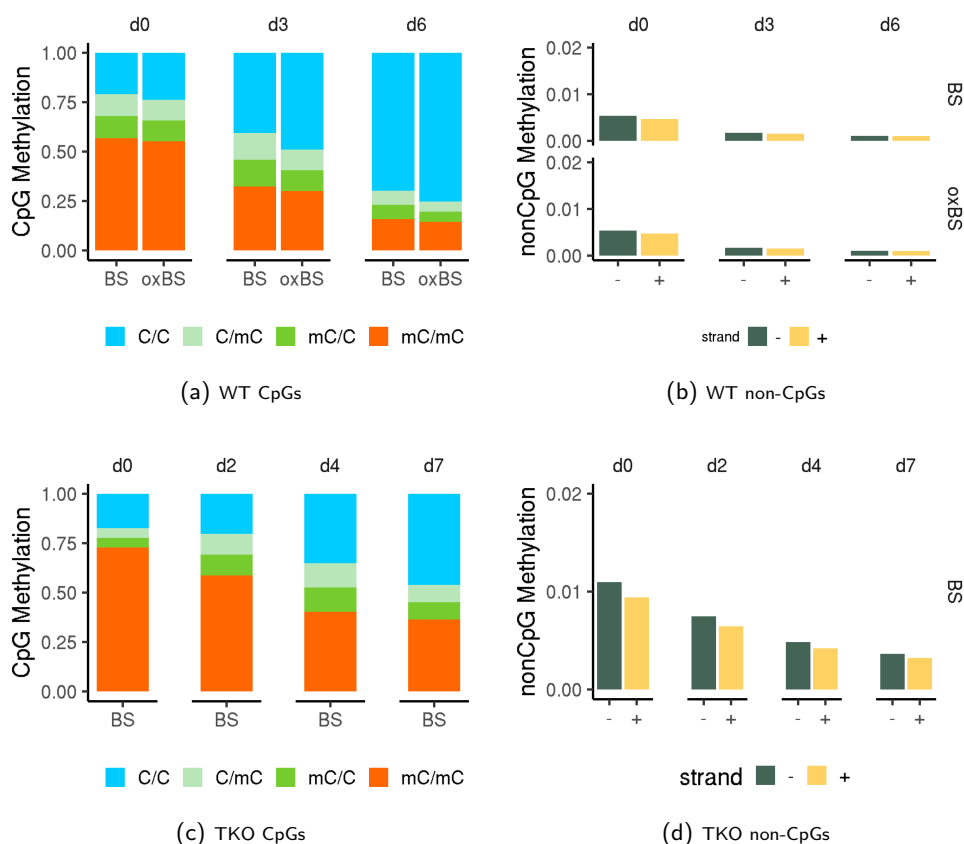

Figure 1: **Demethylation of WT and Tet TKO ES cells. (A)** Average strand specific CpG methylation of WT ES cells in Serum/LIF (d0) and 2i (d3, d6). **(B)** Average strand specific non-CpG methylation of WT ES cells in Serum/LIF and 2i. **(C)** Average strand specific CpG methylation of Tet TKO ES cells in Serum/LIF and 2i (d2, d4, d7). **(D)** Average strand specific non-CpG methylation of Tet TKO ES cells in Serum/LIF and 2i.

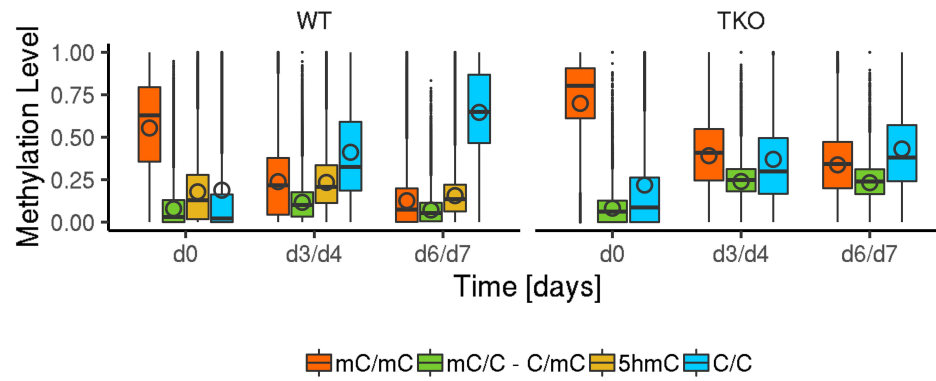

(a) Genome wide estimated methylation levels

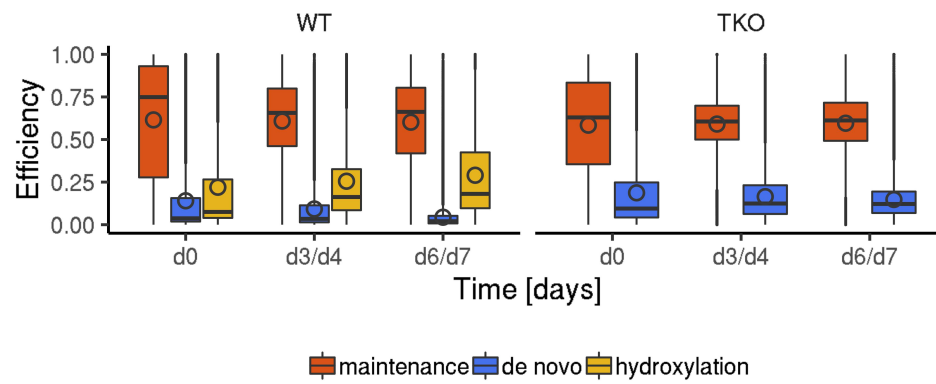

(b) Genome wide estimated enzymatic efficiencies

Figure 2: **Hidden Markov model output.** (A) average estimated 5mC/5hmC level across the genome (B) average estimated maintenance efficiency, *de novo* efficiency and hydroxylation efficiency.



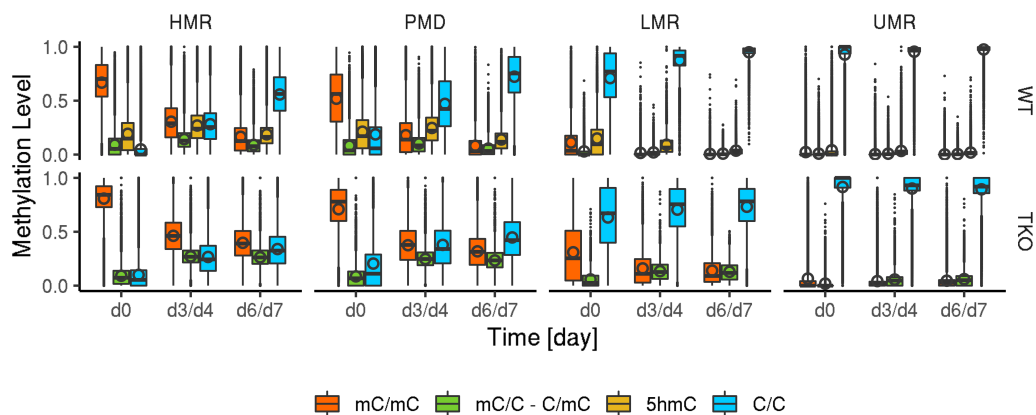

(a) Methylation Pattern

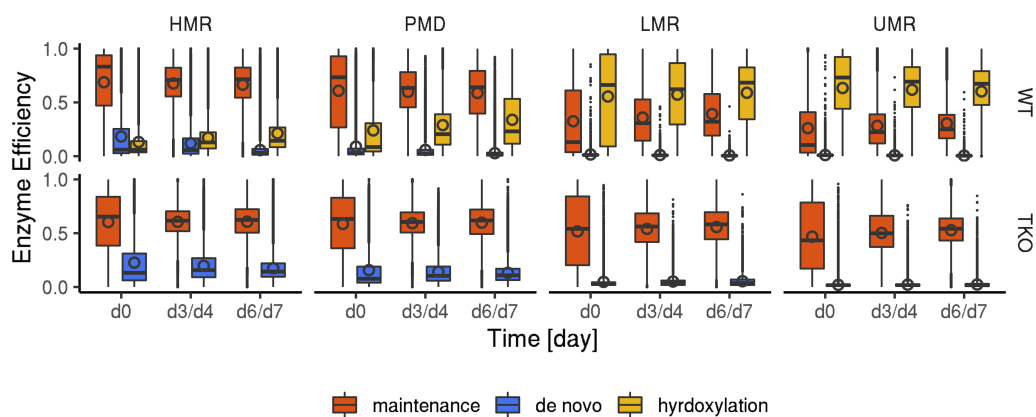

(b) Enzyme Efficiencies

Figure 3: **Methylome Segmentation.** Based on previous published WGBS data, the genome was partitioned in highly methylated regions (HMRs), partially methylated domains (PMDs), low methylated regions (LMRs) and unmethylated regions (UMRs); **(A)** DNA methylation patterns of HMRs, PMDs, LMRs and UMRs derived from HM modeling of RRHPoxBS data; **(B)** HMM estimated enzyme efficiencies of Dnmts (maintenance and *de novo*) and Tets (hydroxylation) for HMRs, PMDs, LMRs and UMRs.

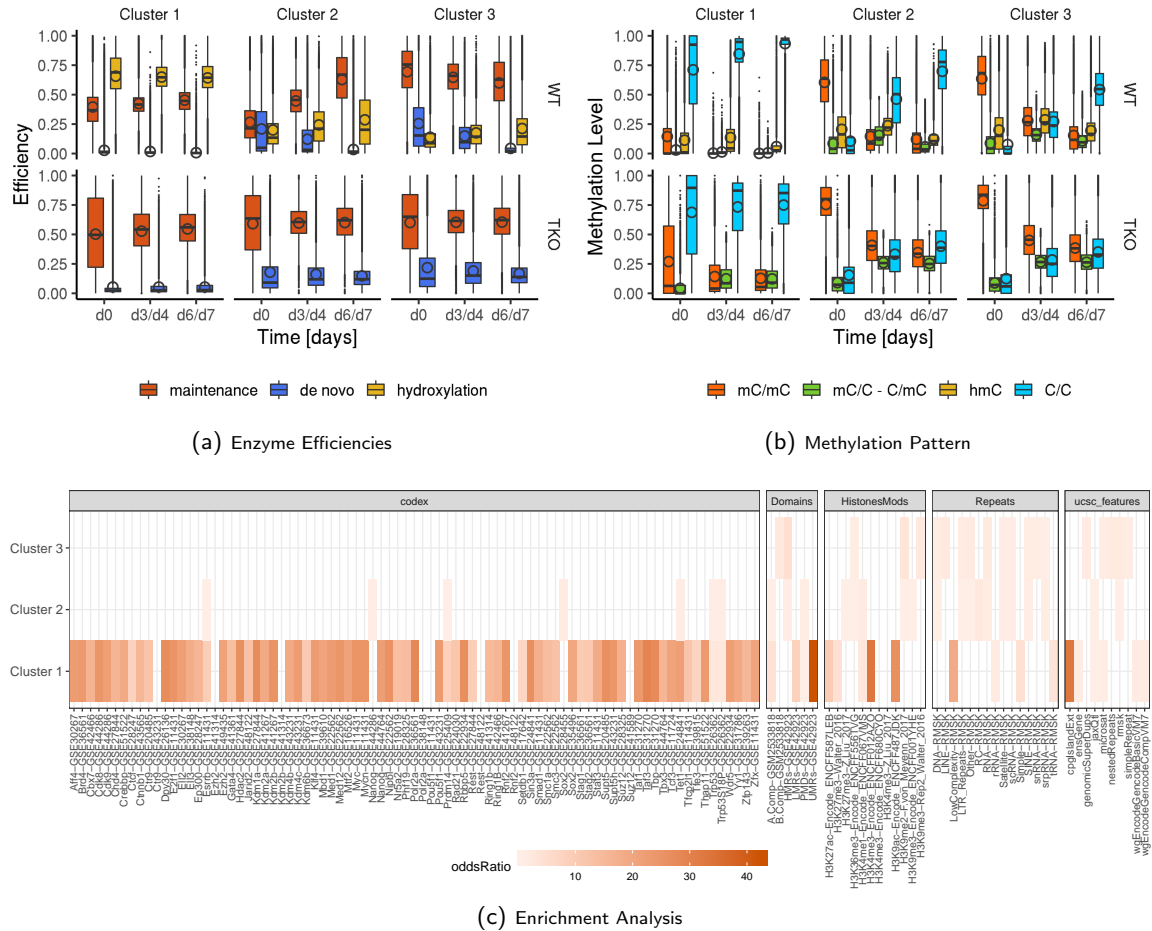

**Figure 4: Clustering of individual CpGs based on their Efficiency Profile.** CpGs were assigned to three clusters based on their combination of enzyme efficiencies, as well as the changes of enzyme efficiencies over time. **(A)** HMM estimated enzyme efficiencies of Dnmts (maintenance and *de novo*) and Tets (hydroxylation) for Cluster 1 to 3. **(B)** DNA methylation patterns of Cluster 1 to 3 derived from HM modeling of RRHPoxBS data; **(C)** Enrichment analysis of genomic and epigenetic features within the three distinct clusters using LOLA. Colored tiles indicate enrichment with oddsRatio  $\geq 1$ .

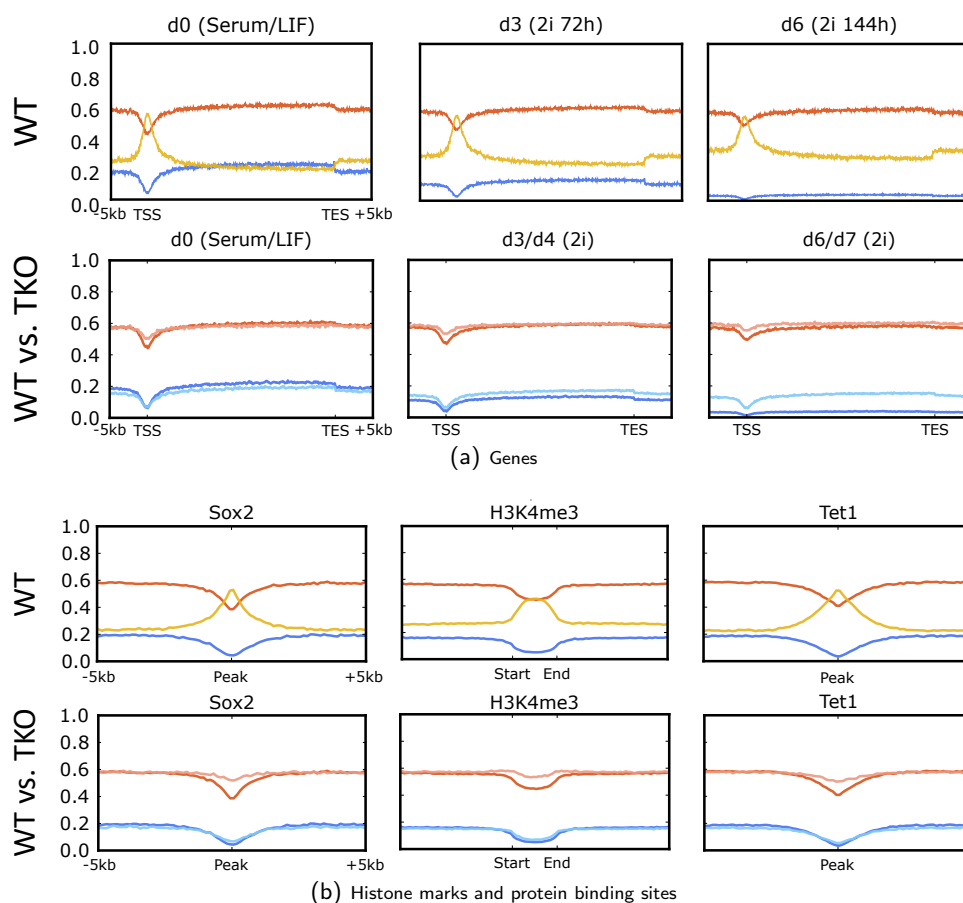

Figure 5: **Average efficiency profiles across genes and protein binding sites.** **(A)** Average maintenance, *de novo* and hydroxylation efficiency of WT and Tet TKO cells across genes; **(B)** Average maintenance, *de novo* and hydroxylation efficiency across selected chromatin marks and protein binding sites. red = maintenance methylation efficiency, blue = *de novo* methylation efficiency, yellow = hydroxylation efficiency. Dark colors indicate the enzyme efficiencies in WT ES cells, light colors refer to the enzyme efficiencies of Tet TKO ES cells.

## 544 **Competing interests**

545 W.R. is a consultant and shareholder of Cambridge Epigenetix. The remaining  
546 authors declare no competing interests.

## 547 **Funding**

548 The project was funded by the DFG during the course of the SFB1309 and the  
549 German Epigenome Programme (DEEP) of the Federal Ministry of Education and  
550 Research in Germany (BMBF) [01KU1216 to J.W.].

## 551 **Author's contributions**

552 Conceived and designed the experiments: CK PG WR VW JW. Wrote the manuscript:  
553 CK PG JW VW. Performed the experiments: PG FvM GF. Processed the raw data:  
554 KN. Designed/implemented the computational methods: CK. Analyzed the data:  
555 CK. Performed meta analysis: CK PG KN AS FM.

## 556 **Software Availability**

557 All Matlab scripts written for implementing the single CpG stochastic model, run it  
558 in a parallel fashion on a multi-core environment and perform the subsequent compu-  
559 tational analysis presented in the manuscript and the appendix are shared via GitHub  
560 (<https://github.com/kyriakopou/hydroxyGit/tree/master/genomeWide>)

## 561 **Acknowledgements**

562 We thank Jasmin Kirch and Gilles Gasparoni for performing the sequencing using  
563 the Illumina HiSeq2500 system and Andreas Firczynski for the optimization of the

564 processing pipeline for the hairpin sequencing data.

## 565 **Supplementary Information**

566 **Supplementary\_Information.pdf** - contains details about modeling, the param-  
567 eter estimation method, as well as further computational analysis and additional  
568 results.

569 **SI\_Table1.pdf** - contains the complete output of the LOLA enrichment analysis.

## 570 **Accession Numbers**

571 The data will be available at the NCBI GEO database

## References

- [1] Robin Holliday and John E Pugh. Dna modification mechanisms and gene activity during development. *Science*, 187(4173):226–232, 1975.
- [2] Arthur D Riggs. X inactivation, differentiation, and dna methylation. *Cytogenetic and Genome Research*, 14(1):9–25, 1975.
- [3] Déborah Bourc’his and Timothy H Bestor. Meiotic catastrophe and retrotransposon reactivation in male germ cells lacking dnmt3l. *Nature*, 431(7004):96, 2004.
- [4] En Li, Timothy H Bestor, and Rudolf Jaenisch. Targeted mutation of the dna methyltransferase gene results in embryonic lethality. *Cell*, 69(6):915–926, 1992.
- [5] Bernard H Ramsahoye, Detlev Biniszkiwicz, Frank Lyko, Victoria Clark, Adrian P Bird, and Rudolf Jaenisch. Non-cpg methylation is prevalent in embryonic stem cells and may be mediated by dna methyltransferase 3a. *Proceedings of the National Academy of Sciences*, 97(10):5237–5242, 2000.
- [6] Michael J Ziller, Fabian Müller, Jing Liao, Yingying Zhang, Hongcang Gu, Christoph Bock, Patrick Boyle, Charles B Epstein, Bradley E Bernstein, Thomas Lengauer, et al. Genomic distribution and inter-sample variation of non-cpg methylation across human cell types. *PLoS genetics*, 7(12):e1002389, 2011.
- [7] Ryan Lister, Mattia Pelizzola, Robert H Downen, R David Hawkins, Gary Hon, Julian Tonti-Filippini, Joseph R Nery, Leonard Lee, Zhen Ye, Que-Minh Ngo, et al. Human dna methylomes at base resolution show widespread epigenomic differences. *nature*, 462(7271):315, 2009.

- [8] Heinrich Leonhardt, Andrea W Page, Heinz-Ulrich Weier, and Timothy H Bestor. A targeting sequence directs dna methyltransferase to sites of dna replication in mammalian nuclei. *Cell*, 71(5):865–873, 1992.
- [9] Linda S-H Chuang, Hang-In Ian, Tong-Wey Koh, Huck-Hui Ng, Guoliang Xu, and Benjamin FL Li. Human dna-(cytosine-5) methyltransferase-pcna complex as a target for p21waf1. *Science*, 277(5334):1996–2000, 1997.
- [10] Magnolia Bostick, Jong Kyong Kim, Pierre-Olivier Estève, Amander Clark, Sriharsa Pradhan, and Steven E Jacobsen. Uhrf1 plays a role in maintaining dna methylation in mammalian cells. *Science*, 317(5845):1760–1764, 2007.
- [11] Jafar Sharif, Masahiro Muto, Shin-ichiro Takebayashi, Isao Suetake, Akihiro Iwamatsu, Takaho A Endo, Jun Shinga, Yoko Mizutani-Koseki, Tetsuro Toyoda, Kunihiro Okamura, et al. The sra protein np95 mediates epigenetic inheritance by recruiting dnmt1 to methylated dna. *Nature*, 450(7171):908–912, 2007.
- [12] Kyohei Arita, Mariko Ariyoshi, Hidehito Tochio, Yusuke Nakamura, and Masahiro Shirakawa. Recognition of hemi-methylated dna by the sra protein uhrf1 by a base-flipping mechanism. *Nature*, 455(7214):818, 2008.
- [13] Andrea Hermann, Rachna Goyal, and Albert Jeltsch. The dnmt1 dna-(cytosine-c5)-methyltransferase methylates dna processively with high preference for hemimethylated target sites. *Journal of Biological Chemistry*, 279(46):48350–48359, 2004.
- [14] Masaki Okano, Shaoping Xie, and En Li. Cloning and characterization of a family of novel mammalian dna (cytosine-5) methyltransferases. *Nature genetics*, 19(3):219, 1998.

- [15] Masaki Okano, Daphne W Bell, Daniel A Haber, and En Li. Dna methyltransferases dnmt3a and dnmt3b are essential for de novo methylation and mammalian development. *Cell*, 99(3):247–257, 1999.
- [16] Daniela Meilinger, Karin Fellinger, Sebastian Bultmann, Ulrich Rothbauer, Ian Marc Bonapace, Wolfgang EF Klinkert, Fabio Spada, and Heinrich Leonhardt. Np95 interacts with de novo dna methyltransferases, dnmt3a and dnmt3b, and mediates epigenetic silencing of the viral cmv promoter in embryonic stem cells. *EMBO reports*, 10(11):1259–1264, 2009.
- [17] Gangning Liang, Matilda F Chan, Yoshitaka Tomigahara, Yvonne C Tsai, Felicidad A Gonzales, En Li, Peter W Laird, and Peter A Jones. Cooperativity between dna methyltransferases in the maintenance methylation of repetitive elements. *Molecular and cellular biology*, 22(2):480–491, 2002.
- [18] Julia Arand, David Spieler, Tommy Karius, Miguel R Branco, Daniela Meilinger, Alexander Meissner, Thomas Jenuwein, Guoliang Xu, Heinrich Leonhardt, Verena Wolf, et al. In vivo control of cpg and non-cpg dna methylation by dna methyltransferases. *PLoS genetics*, 8(6):e1002750, 2012.
- [19] Ryoichi Ono, Tomohiko Taki, Takeshi Taketani, Masafumi Taniwaki, Hajime Kobayashi, and Yasuhide Hayashi. Lcx, leukemia-associated protein with a cxxc domain, is fused to mll in acute myeloid leukemia with trilineage dysplasia having t (10; 11)(q22; q23). *Cancer research*, 62(14):4075–4080, 2002.
- [20] RB Lorsbach, J Moore, S Mathew, SC Raimondi, ST Mukatira, and JR Downing. Tet1, a member of a novel protein family, is fused to mll in acute myeloid leukemia containing the t (10; 11)(q22; q23). *Leukemia*, 17(3):637, 2003.
- [21] Lakshminarayan M Iyer, Mamta Tahiliani, Anjana Rao, and L Aravind. Prediction of novel families of enzymes involved in oxidative and other complex modifications of bases in nucleic acids. *Cell cycle*, 8(11):1698–1710, 2009.



- [22] Mamta Tahiliani, Kian Peng Koh, Yinghua Shen, William A Pastor, Hozefa Bandukwala, Yevgeny Brudno, Suneet Agarwal, Lakshminarayan M Iyer, David R Liu, L Aravind, et al. Conversion of 5-methylcytosine to 5-hydroxymethylcytosine in mammalian dna by mll partner tet1. *Science*, 324(5929):930–935, 2009.
- [23] Shinsuke Ito, Li Shen, Qing Dai, Susan C Wu, Leonard B Collins, James A Swenberg, Chuan He, and Yi Zhang. Tet proteins can convert 5-methylcytosine to 5-formylcytosine and 5-carboxylcytosine. *Science*, 333(6047):1300–1303, 2011.
- [24] Daniel Globisch, Martin Münzel, Markus Müller, Stylianos Michalakis, Mirko Wagner, Susanne Koch, Tobias Brückl, Martin Biel, and Thomas Carell. Tissue distribution of 5-hydroxymethylcytosine and search for active demethylation intermediates. *PloS one*, 5(12):e15367, 2010.
- [25] Skirmantas Kriaucionis and Nathaniel Heintz. The nuclear dna base 5-hydroxymethylcytosine is present in purkinje neurons and the brain. *Science*, 324(5929):929–930, 2009.
- [26] Aleksandra Szwagierczak, Sebastian Bultmann, Christine S Schmidt, Fabio Spada, and Heinrich Leonhardt. Sensitive enzymatic quantification of 5-hydroxymethylcytosine in genomic dna. *Nucleic acids research*, 38(19):e181–e181, 2010.
- [27] Martin Bachman, Santiago Uribe-Lewis, Xiaoping Yang, Michael Williams, Adele Murrell, and Shankar Balasubramanian. 5-hydroxymethylcytosine is a predominantly stable dna modification. *Nature chemistry*, 6(12):1049, 2014.
- [28] Eun-Ang Raiber, Pierre Murat, Dimitri Y Chirgadze, Dario Beraldi, Ben F Luisi, and Shankar Balasubramanian. 5-formylcytosine alters the structure of the dna double helix. *Nature Structural and Molecular Biology*, 22(1):44, 2015.

- [29] Matthew W Kellinger, Chun-Xiao Song, Jenny Chong, Xing-Yu Lu, Chuan He, and Dong Wang. 5-formylcytosine and 5-carboxylcytosine reduce the rate and substrate specificity of rna polymerase ii transcription. *Nature Structural and Molecular Biology*, 19(8):831, 2012.
- [30] Hideharu Hashimoto, Yiwei Liu, Anup K Upadhyay, Yanqi Chang, Shelley B Howerton, Paula M Vertino, Xing Zhang, and Xiaodong Cheng. Recognition and potential mechanisms for replication and erasure of cytosine hydroxymethylation. *Nucleic acids research*, 40(11):4841–4849, 2012.
- [31] Victoria Valinluck and Lawrence C Sowers. Endogenous cytosine damage products alter the site selectivity of human dna maintenance methyltransferase dnmt1. *Cancer research*, 67(3):946–950, 2007.
- [32] Debin Ji, Krystal Lin, Jikui Song, and Yinsheng Wang. Effects of tet-induced oxidation products of 5-methylcytosine on dnmt1-and dnmt3a-mediated cytosine methylation. *Molecular bioSystems*, 10(7):1749–1752, 2014.
- [33] Yu-Fei He, Bin-Zhong Li, Zheng Li, Peng Liu, Yang Wang, Qingyu Tang, Jianping Ding, Yingying Jia, Zhangcheng Chen, Lin Li, et al. Tet-mediated formation of 5-carboxylcytosine and its excision by tdg in mammalian dna. *Science*, 333(6047):1303–1307, 2011.
- [34] Atanu Maiti and Alexander C Drohat. Thymine dna glycosylase can rapidly excise 5-formylcytosine and 5-carboxylcytosine potential implications for active demethylation of cpg sites. *Journal of Biological Chemistry*, 286(41):35334–35338, 2011.
- [35] Zachary D Smith, Michelle M Chan, Tarjei S Mikkelsen, Hongcang Gu, Andreas Gnirke, Aviv Regev, and Alexander Meissner. A unique regulatory phase of dna methylation in the early mammalian embryo. *Nature*, 484(7394):339, 2012.

- [36] J Oswald, S Engemann, N Lane, W Mayer, A Olek, R Fundele, W Dean, W Reik, and J Walter. Active demethylation of the paternal genome in the mouse zygote. *Current Biology*, 10(8):475–478, 2000.
- [37] Petra Hajkova, Sean J Jeffries, Caroline Lee, Nigel Miller, Stephen P Jackson, and M Azim Surani. Genome-wide reprogramming in the mouse germ line entails the base excision repair pathway. *Science*, 329(5987):78–82, 2010.
- [38] Gabriella Ficz, Timothy A Hore, Fatima Santos, Heather J Lee, Wendy Dean, Julia Arand, Felix Krueger, David Oxley, Yu-Lee Paul, Jörn Walter, et al. Fgf signaling inhibition in escs drives rapid genome-wide demethylation to the epigenetic ground state of pluripotency. *Cell stem cell*, 13(3):351–359, 2013.
- [39] Ehsan Habibi, Arie B Brinkman, Julia Arand, Leonie I Kroeze, Hindrik HD Kerstens, Filomena Matarese, Konstantin Lepikhov, Marta Gut, Isabelle Brun-Heath, Nina C Hubner, et al. Whole-genome bisulfite sequencing of two distinct interconvertible dna methylomes of mouse embryonic stem cells. *Cell stem cell*, 13(3):360–369, 2013.
- [40] Marius Walter, Aurélie Teissandier, Raquel Pérez-Palacios, and Déborah Bourc'his. An epigenetic switch ensures transposon repression upon dynamic loss of dna methylation in embryonic stem cells. *Elife*, 5, 2016.
- [41] Alexander Meissner, Andreas Gnirke, George W Bell, Bernard Ramsahoye, Eric S Lander, and Rudolf Jaenisch. Reduced representation bisulfite sequencing for comparative high-resolution dna methylation analysis. *Nucleic acids research*, 33(18):5868–5877, 2005.
- [42] Charles D Laird, Nicole D Pleasant, Aaron D Clark, Jessica L Sneed, KM Anwarul Hassan, Nathan C Manley, Jay C Vary, Todd Morgan, R Scott Hansen, and Reinhard Stöger. Hairpin-bisulfite pcr: assessing epigenetic methylation

- patterns on complementary strands of individual dna molecules. *Proceedings of the National Academy of Sciences*, 101(1):204–209, 2004.
- [43] Pascal Giehr and Jörn Walter. Hairpin bisulfite sequencing: Synchronous methylation analysis on complementary dna strands of individual chromosomes. In *DNA Methylation Protocols*, pages 573–586. Springer, 2018.
- [44] Lei Zhao, Ming-an Sun, Zejuan Li, Xue Bai, Miao Yu, Min Wang, Liji Liang, Xiaojian Shao, Stephen Arnovitz, Qianfei Wang, et al. The dynamics of dna methylation fidelity during mouse embryonic stem cell self-renewal and differentiation. *Genome research*, 24(8):1296–1307, 2014.
- [45] Michael J Booth, Miguel R Branco, Gabriella Ficz, David Oxley, Felix Krueger, Wolf Reik, and Shankar Balasubramanian. Quantitative sequencing of 5-methylcytosine and 5-hydroxymethylcytosine at single-base resolution. *Science*, 336(6083):934–937, 2012.
- [46] Charalampos Kyriakopoulos, Pascal Giehr, and Verena Wolf. H (o) ta: estimation of dna methylation and hydroxylation levels and efficiencies from time course data. *Bioinformatics*, 33(11):1733–1734, 2017.
- [47] Pascal Giehr, Charalampos Kyriakopoulos, Gabriella Ficz, Verena Wolf, and Jörn Walter. The influence of hydroxylation on maintaining cpg methylation patterns: a hidden markov model approach. *PLoS computational biology*, 12(5):e1004905, 2016.
- [48] Jacob Porter, Ming-an Sun, Hehuang Xie, and Liqing Zhang. Investigating bisulfite short-read mapping failure with hairpin bisulfite sequencing data. *BMC genomics*, 16(11):S2, 2015.
- [49] Babraham Bioinformatics - Trim Galore!

- [50] Marcel Martin. Cutadapt removes adapter sequences from high-throughput sequencing reads. *EMBnet. journal*, 17(1):pp–10, 2011.
- [51] Santiago Marco-Sola, Michael Sammeth, Roderic Guigó, and Paolo Ribeca. The gem mapper: fast, accurate and versatile alignment by filtration. *Nature methods*, 9(12):1185, 2012.
- [52] Heng Li, Bob Handsaker, Alec Wysoker, Tim Fennell, Jue Ruan, Nils Homer, Gabor Marth, Goncalo Abecasis, and Richard Durbin. The sequence alignment/map format and samtools. *Bioinformatics*, 25(16):2078–2079, 2009.
- [53] Leo Goodstadt. Ruffus: a lightweight python library for computational pipelines. *Bioinformatics*, 26(21):2778–2779, 2010.
- [54] Samuel L Braunstein. How large a sample is needed for the maximum likelihood estimator to be approximately gaussian? *Journal of Physics A: Mathematical and General*, 25(13):3813, 1992.
- [55] Scott J Long and Jeremy Freese. *Regression models for categorical dependent variables using Stata*. Stata press, 2006.
- [56] Ronald Schoenberg. Constrained maximum likelihood. *Computational Economics*, 10(3):251–266, 1997.
- [57] Lukas Burger, Dimos Gaidatzis, Dirk Schübeler, and Michael B Stadler. Identification of active regulatory regions from dna methylation data. *Nucleic acids research*, 41(16):e155–e155, 2013.
- [58] Cath Tyner, Galt P Barber, Jonathan Casper, Hiram Clawson, Mark Diekhans, Christopher Eisenhart, Clayton M Fischer, David Gibson, Jairo Navarro Gonzalez, Luvina Guruvadoo, et al. The ucsc genome browser database: 2017 update. *Nucleic acids research*, 45(D1):D626–D634, 2016.

- [59] Nathan C Sheffield and Christoph Bock. Lola: enrichment analysis for genomic region sets and regulatory elements in R and Bioconductor. *Bioinformatics*, 32(4):587–589, 2015.
- [60] Ferdinand von Meyenn, Mario Iurlaro, Ehsan Habibi, Ning Qing Liu, Ali Salehzadeh-Yazdi, Fátima Santos, Edoardo Petrini, Inês Milagre, Miao Yu, Zhenqing Xie, et al. Impairment of DNA methylation maintenance is the main cause of global demethylation in naive embryonic stem cells. *Molecular Cell*, 62(6):848–861, 2016.
- [61] Isaac F López-Moyado, Ageliki Tsagaratou, Hiroshi Yuita, Hyungseok Seo, Benjamin Delatte, Sven Heinz, Christopher Benner, and Anjana Rao. Paradoxical association of Tet loss of function with genome-wide DNA hypomethylation. *Proceedings of the National Academy of Sciences*, 116(34):16933–16942, 2019.
- [62] Fidel Ramírez, Friederike Dündar, Sarah Diehl, Björn A Grüning, and Thomas Manke. deepTools: a flexible platform for exploring deep-sequencing data. *Nucleic Acids Research*, 42(W1):W187–W191, 2014.
- [63] Tuncay Baubec, Daniele F Colombo, Christiane Wirbelauer, Juliane Schmidt, Lukas Burger, Arnaud R Krebs, Altuna Akalin, and Dirk Schübeler. Genomic profiling of DNA methyltransferases reveals a role for DNMT3B in genomic methylation. *Nature*, 520(7546):243, 2015.
- [64] Tianpeng Gu, Xueqiu Lin, Sean M Cullen, Min Luo, Mira Jeong, Marcos Estecio, Jianjun Shen, Swanand Hardikar, Deqiang Sun, Jianzhong Su, et al. DNMT3A and Tet1 cooperate to regulate promoter epigenetic landscapes in mouse embryonic stem cells. *Genome Biology*, 19(1):88, 2018.
